# Supplementary material for: To what extent is socioeconomic status associated with not taking up and dropout from cardiac rehabilitation: a population-based follow-up study
Source: HighWire-hosted journal article supplement (doi:10.1136/bmjopen-2022-060924), 2022-06-01
Supplement: bmjopen-2022-060924supp001_data_supplement.pdf [file bmjopen-2022-060924supp001_data_supplement.pdf]

## SUPPLEMENTARY MATERIAL

This document includes:

- Supplementary Table 1. Cardiac rehabilitation activities among the 1,568 patients participating in the initial meeting (page 2-3)
- Supplementary Table 2. Baseline characteristics of 1,568 patients with ischemic heart disease participating in the initial cardiac rehabilitation meeting (page 4-6)
- Supplementary Table 3. Associations between socioeconomic status and the three activities in the composite measure of dropout (n=1,568) (page 7-9)
- Supplementary Table 4. Associations between socioeconomic status and no uptake of cardiac rehabilitation among referred patients (n=2,018): recoding no uptake (page 10-11)
- Supplementary Table 5. Associations between socioeconomic status and not taking up cardiac rehabilitation among referred patients (n=2,018): mutual adjustment for the indicators of socioeconomic status (page 12-13)
- Supplementary Table 6. Associations between socioeconomic status and dropout from cardiac rehabilitation among participants in the initial meeting (n=1,568): mutual adjustment for the indicators of socioeconomic status (page 14-15)

**SUPPLEMENTARY TABLE 1****Title**

Supplementary Table 1. Cardiac rehabilitation activities among the 1,568 patients participating in the initial meeting

**Description**

This table demonstrates the number and percentages of patients accepting the cardiac rehabilitation activities decided by agreed personalised planning at the initial cardiac rehabilitation meeting.

**Supplementary Table 1. Cardiac rehabilitation activities among the 1,568 patients participating in the initial meeting**

| <b>CR activities</b>           | <b>Accept to participate, n (%)</b> |
|--------------------------------|-------------------------------------|
| Closing MEE alone              | 41 (2.6)                            |
| PE alone                       | 13 (0.8)                            |
| PET alone                      | 173 (11.0)                          |
| Closing MEE + PE               | 10 (0.6)                            |
| Closing MEE + PET              | 459 (29.3)                          |
| PE + PET                       | 169 (10.8)                          |
| Closing MEE + PE + PET         | 588 (37.5)                          |
| No acceptance + missing values | 39 (2.5)                            |
| Missing values on all three    | 76 (4.8)                            |

CR, cardiac rehabilitation; closing MEE, closing cardiac rehabilitation meeting; PE, patient education; PET, physical exercise training.

**SUPPLEMENTARY TABLE 2****Title**

Supplementary Table 2. Baseline characteristics of 1,568 patients with ischemic heart disease participating in the initial cardiac rehabilitation meeting.

**Description**

This table demonstrates the patients' baseline characteristics stratified according to the indicators of socioeconomic status among patients participating in the initial cardiac rehabilitation meeting.

These patients compose the study population for the analysis of dropout.

**Supplementary Table 2. Baseline characteristics of 1,568 patients with ischemic heart disease participating in the initial cardiac rehabilitation meeting.**

| Indicators of SES   | Dropout<br>n (%)* | Characteristics  |                 |                           |                                         |                        |                    |
|---------------------|-------------------|------------------|-----------------|---------------------------|-----------------------------------------|------------------------|--------------------|
|                     |                   | Age<br>mean (SD) | Male**<br>n (%) | Danish origin***<br>n (%) | Charlson Comorbidity Index****<br>n (%) |                        |                    |
|                     |                   |                  |                 |                           | Low, score<br>0                         | Moderate,<br>score 1–2 | High, score<br>3–8 |
| Educational level   |                   |                  |                 |                           |                                         |                        |                    |
| - High              | 76 (21.7)         | 64.2 (10.0)      | 264 (75.2)      | 328 (93.5)                | -                                       | -                      | -                  |
| - Medium            | 160 (22.5)        | 63.8 (10.5)      | 573 (80.5)      | 680 (95.5)                | -                                       | -                      | -                  |
| - Low               | 133 (27.7)        | 66.4 (11.1)      | 312 (64.9)      | 446 (92.7)                | -                                       | -                      | -                  |
| - Missing           | 8 (33.3)          | 63.6 (11.9)      | 15 (62.5)       | 15 (62.5)                 | -                                       | -                      | -                  |
| Family income level |                   |                  |                 |                           |                                         |                        |                    |
| - High              | 119 (20.7)        | 61.6 (9.2)       | 483 (83.9)      | 563 (97.7)                | 364 (63.2)                              | 173 (30.0)             | 39 (6.8)           |
| - Medium            | 108 (20.4)        | 65.5 (10.3)      | 397 (75.1)      | 499 (94.3)                | 287 (54.3)                              | 177 (33.5)             | 65 (12.3)          |
| - Low               | 150 (32.4)        | 67.6 (11.8)      | 284 (61.3)      | 407 (87.9)                | 228 (49.2)                              | 149 (32.2)             | 86 (18.6)          |
| Occupational status |                   |                  |                 |                           |                                         |                        |                    |

Side 5 of 15

|                       |            |             |            |              |            |            |            |
|-----------------------|------------|-------------|------------|--------------|------------|------------|------------|
| - Employment          | 129 (21.2) | 56.9 (7.5)  | 507 (83.3) | 585 (96.1)   | 417 (68.5) | 164 (26.9) | 28 (4.6)   |
| - Age-related pension | 175 (22.1) | 72.9 (5.8)  | 549 (69.4) | 758 (95.8)   | 379 (47.9) | 273 (34.5) | 139 (17.6) |
| - Social benefit      | 73 (43.5)  | 54.5 (7.9)  | 108 (64.3) | 126 (75.0)   | 83 (49.4)  | 62 (36.9)  | 23 (13.7)  |
| Living alone          |            |             |            |              |            |            |            |
| - No                  | 258 (21.6) | 64.7 (10.3) | 945 (79.1) | 1,116 (93.4) | 686 (57.4) | 376 (31.5) | 133 (11.1) |
| - Yes                 | 119 (31.9) | 64.6 (11.8) | 219 (58.7) | 353 (94.6)   | 193 (51.7) | 123 (33.0) | 57 (15.3)  |

SES, socioeconomic status; SD, standard deviation.

\* The inverse percentage that adds up to 100% represents the patients in the specific category of the SES indicator who did not dropout.

\*\* Sex (male/female). The inverse percentage, that adds up to 100%, represents females.

\*\*\* Nationality (Danish/not Danish). The inverse percentage, that adds up to 100%, represents persons not of Danish origin.

\*\*\*\* The tabulation of educational level and CCI is not shown in order to protect personal data. This table shows similar tendencies to those observed in Table 1 of the article.

**SUPPLEMENTARY TABLE 3****Title**

Supplementary Table 3. Associations between socioeconomic status and the three activities in the composite measure of dropout (n=1,568).

**Description**

This table shows the results of a sensitivity analysis assessing the individual associations between the four indicators of socioeconomic status and each of the three cardiac rehabilitation activities in the composite measure of dropout.

**Supplementary Table 3. Associations between socioeconomic status and the three activities in the composite measure of dropout (n=1,568)**

| Indicators of SES     | No closing CR meeting within 180 days |                  |                  | Adherence to < 75 % of planned sessions of PET |                  |                  | Adherence to < 75 % of planned sessions of PE |                  |                  |
|-----------------------|---------------------------------------|------------------|------------------|------------------------------------------------|------------------|------------------|-----------------------------------------------|------------------|------------------|
|                       |                                       | Unadjusted       | Adjusted*        |                                                | Unadjusted       | Adjusted*        |                                               | Unadjusted       | Adjusted*        |
|                       | n (%)                                 | OR (95 % CI)     | OR (95 % CI)     | n (%)                                          | OR (95 % CI)     | OR (95 % CI)     | n (%)                                         | OR (95 % CI)     | OR (95 % CI)     |
| Educational level     |                                       |                  |                  |                                                |                  |                  |                                               |                  |                  |
| - High                | 104 (29.6)                            | 1 (reference)    | 1 (reference)    | 93 (30.2)                                      | 1 (reference)    | 1 (reference)    | 48 (27.9)                                     | 1 (reference)    | 1 (reference)    |
| - Medium              | 193 (27.1)                            | 0.88 (0.67-1.17) | 0.86 (0.64-1.14) | 215 (34.7)                                     | 1.23 (0.91-1.65) | 1.21 (0.89-1.63) | 128 (39.6)                                    | 1.70 (1.14-2.53) | 1.60 (1.06-2.42) |
| - Low                 | 165 (34.3)                            | 1.24 (0.92-1.67) | 1.20 (0.88-1.62) | 155 (38.4)                                     | 1.44 (1.05-1.97) | 1.39 (1.00-1.92) | 70 (33.8)                                     | 1.32 (0.85-2.05) | 1.24 (0.79-1.97) |
| Family income level   |                                       |                  |                  |                                                |                  |                  |                                               |                  |                  |
| - High                | 151 (26.2)                            | 1 (reference)    | 1 (reference)    | 165 (33.3)                                     | 1 (reference)    | 1 (reference)    | 84 (32.2)                                     | 1 (reference)    | 1 (reference)    |
| - Medium              | 141 (26.7)                            | 1.02 (0.78-1.34) | 1.06 (0.81-1.40) | 133 (29.3)                                     | 0.83 (0.63-1.09) | 0.87 (0.65-1.16) | 83 (32.9)                                     | 1.03 (0.72-1.50) | 1.09 (0.74-1.60) |
| - Low                 | 178 (38.4)                            | 1.76 (1.35-2.29) | 1.86 (1.39-2.48) | 165 (43.2)                                     | 1.53 (1.16-2.01) | 1.64 (1.21-2.22) | 79 (41.8)                                     | 1.51 (1.03-2.23) | 1.59 (1.04-2.44) |
| Occupational status   |                                       |                  |                  |                                                |                  |                  |                                               |                  |                  |
| - Employment          | 164 (26.9)                            | 1 (reference)    | 1 (reference)    | 193 (36.6)                                     | 1 (reference)    | 1 (reference)    | 106 (37.2)                                    | 1 (reference)    | 1 (reference)    |
| - Age-related pension | 214 (27.1)                            | 1.01 (0.79-1.28) | 1.19 (0.83-1.71) | 192 (28.7)                                     | 0.70 (0.55-0.89) | 0.70 (0.48-1.03) | 104 (29.4)                                    | 0.70 (0.50-0.98) | 0.65 (0.39-1.08) |
| - Social benefit      | 92 (54.8)                             | 3.28 (2.31-4.67) | 2.72 (1.87-3.95) | 78 (57.4)                                      | 2.33 (1.59-3.42) | 1.89 (1.26-2.83) | 36 (57.1)                                     | 2.25 (1.29-3.92) | 1.70 (0.94-3.08) |



|              |            |                  |                  |            |                  |                  |            |                  |                  |
|--------------|------------|------------------|------------------|------------|------------------|------------------|------------|------------------|------------------|
| Living alone |            |                  |                  |            |                  |                  |            |                  |                  |
| - No         | 328 (27.4) | 1 (reference)    | 1 (reference)    | 331 (32.3) | 1 (reference)    | 1 (reference)    | 174 (33.3) | 1 (reference)    | 1 (reference)    |
| - Yes        | 142 (38.1) | 1.62 (1.27-2.08) | 1.62 (1.26-2.09) | 132 (43.0) | 1.58 (1.22-2.05) | 1.57 (1.19-2.06) | 72 (40.0)  | 1.33 (0.94-1.89) | 1.27 (0.88-1.84) |

SES, socioeconomic status; CR, cardiac rehabilitation; PET, physical exercise training; PE, patient education; OR, odds ratio; CI, confidence interval.

\* Adjusted for age, sex, nationality, and Charlson Comorbidity index.

**SUPPLEMENTARY TABLE 4****Title**

Supplementary Table 4. Associations between socioeconomic status and no uptake of cardiac rehabilitation among referred patients (n=2,018): recoding no uptake.

**Description**

This table demonstrates the results of a sensitivity analysis concerning the robustness of the definition of the endpoint ‘no uptake’ of cardiac rehabilitation. After recoding ‘no uptake’ to ‘uptake’ for the 17 patients who participated in the initial cardiac rehabilitation meeting more than 30 days before the referral was registered, the associations between the indicators of socioeconomic status and not taking up cardiac rehabilitation (recoded) were analysed.

**Supplementary Table 4. Associations between socioeconomic status and no uptake of cardiac rehabilitation among referred patients (n=2,018): recoding no uptake**

| <b>Indicators of SES</b> | <b>No uptake*</b> | <b>Unadjusted</b>   | <b>Adjusted**</b>   |
|--------------------------|-------------------|---------------------|---------------------|
|                          | <b>n (%)</b>      | <b>OR (95 % CI)</b> | <b>OR (95 % CI)</b> |
| Educational level        |                   |                     |                     |
| - High                   | 84 (19.9)         | 1 (reference)       | 1 (reference)       |
| - Medium                 | 192 (21.6)        | 1.11 (0.84-1.48)    | 1.11 (0.83-1.49)    |
| - Low                    | 199 (29.7)        | 1.71 (1.27-2.28)    | 1.48 (1.10-1.99)    |
| Family income level      |                   |                     |                     |
| - High                   | 105 (15.6)        | 1 (reference)       | 1 (reference)       |
| - Medium                 | 161 (23.9)        | 1.70 (1.29-2.24)    | 1.47 (1.11-1.95)    |
| - Low                    | 224 (33.3)        | 2.70 (2.08-3.52)    | 2.05 (1.54-2.72)    |
| Occupational status      |                   |                     |                     |
| - Employment             | 124 (17.3)        | 1 (reference)       | 1 (reference)       |
| - Age-related pension    | 291 (27.4)        | 1.81 (1.43-2.29)    | 0.70 (0.49-0.99)    |
| - Social benefit         | 75 (31.7)         | 2.22 (1.59-3.11)    | 2.08 (1.44-3.00)    |
| Living alone             |                   |                     |                     |
| - No                     | 288 (19.8)        | 1 (reference)       | 1 (reference)       |
| - Yes                    | 202 (35.8)        | 2.26 (1.82-2.80)    | 2.12 (1.69-2.66)    |

SES, socioeconomic status; OR, odds ratio; CI, confidence interval.

\* No uptake was recoded to uptake for the 17 patients who participated in the initial CR meeting >30 days before registration of the referral.

\*\* Adjusted for age, sex, nationality, and Charlson Comorbidity index.

**SUPPLEMENTARY TABLE 5****Title**

Supplementary Table 5. Associations between socioeconomic status and not taking up cardiac rehabilitation among referred patients (n=2,018): mutual adjustment for the indicators of socioeconomic status.

**Description**

This table demonstrates the results of a sensitivity analysis. The associations between the indicators of socioeconomic status and not taking up cardiac rehabilitation were analysed by including all four indicators of socioeconomic status in the adjusted logistic regression model in addition to age, sex, nationality, and comorbidity.

**Supplementary Table 5. Associations between socioeconomic status and not taking up cardiac rehabilitation among referred patients (n=2,018): mutual adjustment for the indicators of socioeconomic status.**

| <b>Indicators of SES</b> | <b>No uptake<br/>n (%)</b> | <b>Unadjusted<br/>OR (95% CI)</b> | <b>Adjusted*<br/>OR (95% CI)</b> |
|--------------------------|----------------------------|-----------------------------------|----------------------------------|
| Educational level        |                            |                                   |                                  |
| - High                   | 86 (20.3)                  | 1 (reference)                     | 1 (reference)                    |
| - Medium                 | 200 (22.5)                 | 1.14 (0.86–1.51)                  | 1.04 (0.77-1.41)                 |
| - Low                    | 206 (30.8)                 | 1.74 (1.30–2.32)                  | 1.26 (0.92-1.72)                 |
| Family income level      |                            |                                   |                                  |
| - High                   | 109 (16.2)                 | 1 (reference)                     | 1 (reference)                    |
| - Medium                 | 169 (25.1)                 | 1.74 (1.33–2.27)                  | 1.50 (1.10-2.04)                 |
| - Low                    | 229 (34.1)                 | 2.67 (2.06–3.47)                  | 1.67 (1.17-2.36)                 |
| Occupational status      |                            |                                   |                                  |
| - Employment             | 128 (17.8)                 | 1 (reference)                     | 1 (reference)                    |
| - Age-related pension    | 302 (28.4)                 | 1.83 (1.45–2.32)                  | 0.57 (0.38-0.84)                 |
| - Social benefit         | 77 (32.5)                  | 2.22 (1.59–3.10)                  | 1.32 (0.88-1.97)                 |
| Living alone             |                            |                                   |                                  |
| - No                     | 303 (20.8)                 | 1 (reference)                     | 1 (reference)                    |
| - Yes                    | 204 (36.2)                 | 2.15 (1.74–2.66)                  | 1.74 (1.37-2.22)                 |

SES, socioeconomic status; OR, odds ratio; CI, confidence interval.

\* Adjusted for the remaining three indicators of socioeconomic status in addition to age, sex, nationality, and Charlson Comorbidity Index.

**SUPPLEMENTARY TABLE 6****Title**

Supplementary Table 6. Associations between socioeconomic status and dropout from cardiac rehabilitation among participants in the initial meeting (n=1,568): mutual adjustment for the indicators of socioeconomic status.

**Description**

This table demonstrates the results of a sensitivity analysis. The associations between the indicators of socioeconomic status and dropout from cardiac rehabilitation were analysed by including all four indicators of socioeconomic status in the adjusted logistic regression model in addition to age, sex, nationality, and comorbidity.

**Supplementary Table 6. Associations between socioeconomic status and dropout from cardiac rehabilitation among participants in the initial meeting (n=1,568): mutual adjustment for the indicators of socioeconomic status.**

| Indicators of SES     | Dropout<br>n (%) | Unadjusted<br>OR (95% CI) | Adjusted*<br>OR (95% CI) |
|-----------------------|------------------|---------------------------|--------------------------|
| Educational level     |                  |                           |                          |
| - High                | 76 (21.4)        | 1 (reference)             | 1 (reference)            |
| - Medium              | 160 (22.5)       | 1.05 (0.77–1.43)          | 0.95 (0.69-1.31)         |
| - Low                 | 133 (27.7)       | 1.38 (1.00–1.91)          | 1.07 (0.75-1.52)         |
| Family income level   |                  |                           |                          |
| - High                | 119 (20.7)       | 1 (reference)             | 1 (reference)            |
| - Medium              | 108 (20.4)       | 0.99 (0.74–1.32)          | 0.83 (0.60-1.16)         |
| - Low                 | 150 (32.4)       | 1.84 (1.39–2.44)          | 1.32 (0.91-1.93)         |
| Occupational status   |                  |                           |                          |
| - Employment          | 129 (21.2)       | 1 (reference)             | 1 (reference)            |
| - Age-related pension | 175 (22.1)       | 1.06 (0.82–1.37)          | 1.14 (0.74-1.76)         |
| - Social benefit      | 73 (43.5)        | 2.86 (1.99–4.11)          | 2.02 (1.31-3.13)         |
| Living alone          |                  |                           |                          |
| - No                  | 258 (21.6)       | 1 (reference)             | 1 (reference)            |
| - Yes                 | 119 (31.9)       | 1.70 (1.32–2.20)          | 1.48 (1.11-1.98)         |

SES, socioeconomic status; OR, odds ratio; CI, confidence interval.

\* Adjusted for the remaining three indicators of socioeconomic status in addition to age, sex, nationality, and Charlson Comorbidity Index.
